# Supplementary material for: Flower Strips Increase Land Efficiency Use in Associated Crops: Broccoli-Lettuce
Source: Preprints.org preprint supplement (doi:10.20944/preprints202312.0159.v1), 2023-12-04
Supplement: Supplementary file 1 [file supplementary]

**Supplementary Materials**

Table S1. Results of the Analysis of Variance for the total Land Equivalent Ratio (LER) in the first crop cycle.

| **Source of Variation** | **df** | **F Score** | **P Value** |
| --- | --- | --- | --- |
| **Factor 1: Crop density** | 2 | 4.84 | 0.0208 |
| **Factor2: Flower strips** | 1 | 5.61 | 0.0292 |
| **Factor1 x Factor2** | 2 | 0.07 | 0.9296 |
| **Residual** | 18 |  |  |

Table S2. Results of the Analysis of Variance for the total Land Equivalent Ratio (LER) in the second crop cycle.

| **Source of Variation** | **df** | **F Score** | **P Value** |
| --- | --- | --- | --- |
| **Factor 1: Agricultural Management** | 1 | 0.03 | 0.8590 |
| **Factor2: Flower strips** | 1 | 4.13 | 0.0645 |
| **Factor1 x Factor2** | 1 | 0.94 | 0.3502 |
| **Residual** | 12 |  |  |

Table S3. Results of the Analysis of Variance for the lettuce yield in the first crop cycle.

| **Source of Variation** | **df** | **F Score** | **P Value** |
| --- | --- | --- | --- |
| **Factor 1: Crop density** | 3 | 186.3391 | 0.0001 |
| **Factor2: Flower strips** | 1 | 4.1044 | 0.0540 |
| **Factor1 x Factor2** | 3 | 0.4311 | 0.7326 |
| **Residual** | 24 |  |  |

Table S4. Results of the Analysis of Variance for the broccoli yield in the first crop cycle.

| **Source of Variation** | **df** | **F Score** | **P Value** |
| --- | --- | --- | --- |
| **Factor 1: Crop density** | 3 | 8.6724 | 0.0004 |
| **Factor2: Flower strips** | 1 | 0.1406 | 0.7109 |
| **Factor1 x Factor2** | 3 | 0.8638 | 0.4733 |
| **Residual** | 24 |  |  |

Table S5. Results of the Analysis of Variance for the lettuce yield in the second crop cycle.

| **Source of Variation** | **df** | **F Score** | **P Value** |
| --- | --- | --- | --- |
| **Factor 1: Agricultural Management** | 1 | 0.0336 | 0.8558 |
| **Factor2: Flower strips** | 1 | 0.1828 | 0.6722 |
| **Factor1 x Factor2** | 1 | 0.2481 | 0.6223 |
| **Residual** | 28 |  |  |

Table S6. Results of the Analysis of Variance for the broccoli yield in the second crop cycle.

| **Source of Variation** | **df** | **F Score** | **P Value** |
| --- | --- | --- | --- |
| **Factor 1: Agricultural Management** | 1 | 44.6381 | 0.0001 |
| **Factor2: Flower strips** | 1 | 21.1707 | 0.0001 |
| **Factor1 x Factor2** | 1 | 0.0206 | 0.8869 |
| **Residual** | 28 |  |  |

Table S7. Results of the Analysis of Variance for the number of lettuce plants affected by Sclerotinia sp. in the first crop cycle.

| **Source of Variation** | **df** | **F Score** | **P Value** |
| --- | --- | --- | --- |
| **Factor 1: Treatment *** | 3 | 0.9839 | 0.4169 |
| **Factor2: Flower strips** | 1 | 1.6812 | 0.2071 |
| **Factor1 x Factor2** | 1 | 1.1446 | 0.3512 |
| **Residual** | 24 |  |  |

*Treatment: (Pure Stand, Intercropping D1, Intercropping D2, Intercropping D3)

Table S8. Results of the Analysis of Variance for the number of plants affected by mollusk in the first crop cycle.

| **Source of Variation** | **df** | **F Score** | **P Value** |
| --- | --- | --- | --- |
| **Factor 1: Treatment *** | 3 | 4.2722 | 0.0150 |
| **Factor2: Flower strips** | 1 | 21.3650 | 0.0001 |
| **Factor1 x Factor2** | 1 | 10.4349 | 0.0001 |
| **Residual** | 24 |  |  |

*Treatment: (Pure Stand, Intercropping D1, Intercropping D2, Intercropping D3)

Table S9. Results of the Analysis of Variance for the incidence of *Plutella xyllostela* larvae in the first crop cycle.

| **Source of Variation** | **df** | **F Score** | **P Value** |
| --- | --- | --- | --- |
| **Factor 1: Treatment *** | 3 | 0.5061 | 0.6817 |
| **Factor2: Flower strips** | 1 | 0.2600 | 0.6148 |
| **Factor1 x Factor2** | 1 | 1.1348 | 0.3549 |
| **Residual** | 24 |  |  |

*Treatment: (Pure Stand, Intercropping D1, Intercropping D2, Intercropping D3)

Table S10. Results of the Analysis of Variance for the number of lettuce plants affected by *Sclerotinia* sp. in the second crop cycle.

| **Source of Variation** | **Df** | **F Score** | **P Value** |
| --- | --- | --- | --- |
| **Factor 1: Planting System *** | 1 | 9.0000 | 0.0111 |
| **Factor2: Flower strips** | 1 | 1.0000 | 0.3370 |
| **Factor1 x Factor2** | 1 | 9.0000 | 0.0111 |
| **Residual** | 12 |  |  |

*Planting System (Monoculture and Intercropping)

Table S11. Results of the Analysis of Variance for the incidence of *Plutella xyllostela* larvae in the first crop cycle in the second crop cycle.

| **Source of Variation** | **df** | **F Score** | **P Value** |
| --- | --- | --- | --- |
| **Factor 1: Planting System** | 1 | 69.1765 | 0.0001 |
| **Factor2: Flower strips** | 1 | 0.3529 | 0.5635 |
| **Factor1 x Factor2** | 12 | 0.3529 | 0.5635 |
| **Residual** |  |  |  |

*Planting System (Monoculture and Intercropping)

Table S12. Results of the Analysis of Variance for the number of plants affected by mollusk in the first crop cycle in the second crop cycle.

| **Source of Variation** | **df** | **F Score** | **P Value** |
| --- | --- | --- | --- |
| **Factor 1: Planting System** | 1 | 1.3714 | 0.2643 |
| **Factor2: Flower strips** | 1 | 1.3714 | 0.2643 |
| **Factor1 x Factor2** | 12 | 0.3429 | 0.5690 |
| **Residual** |  |  |  |

*Planting System (Monoculture and Intercropping)
